# Supplementary material for: Characterization of bacteriophage communities and CRISPR profiles from dental plaque
Source: PubMed Central journal article supplement (PMC4104742; doi:10.1186/1471-2180-14-175), 2014-06-30
Supplement: 1471-2180-14-175-S1.pdf [file 1471-2180-14-175-S1.pdf]

# Table S1

## Subject demographics

|                  | <b>Age</b> | <b>Gender</b> | <b>Race/Ethnicity</b> |
|------------------|------------|---------------|-----------------------|
| <b>Subject 1</b> | 35         | Male          | African American      |
| <b>Subject 2</b> | 31         | Female        | Asian                 |
| <b>Subject 3</b> | 24         | Female        | Asian                 |
| <b>Subject 4</b> | 29         | Male          | Caucasian             |

**Table S2. International tooth enumeration**

| Tooth Number | International Enumeration |
|--------------|---------------------------|
| 1            | 1.8                       |
| 2            | 1.7                       |
| 3            | 1.6                       |
| 4            | 1.5                       |
| 5            | 1.4                       |
| 6            | 1.3                       |
| 7            | 1.2                       |
| 8            | 1.1                       |
| 9            | 2.1                       |
| 10           | 2.2                       |
| 11           | 2.3                       |
| 12           | 2.4                       |
| 13           | 2.5                       |
| 14           | 2.6                       |
| 15           | 2.7                       |
| 16           | 2.8                       |
| 17           | 3.8                       |
| 18           | 3.7                       |
| 19           | 3.6                       |
| 20           | 3.5                       |
| 21           | 3.4                       |
| 22           | 3.3                       |
| 23           | 3.2                       |
| 24           | 3.1                       |
| 25           | 4.1                       |
| 26           | 4.2                       |
| 27           | 4.3                       |
| 28           | 4.4                       |
| 29           | 4.5                       |
| 30           | 4.6                       |
| 31           | 4.7                       |
| 32           | 4.8                       |

**Table S3**  
**Virome reads from each subject**

|           | Reads         |                      |                             |             |                     |          |       | Contigs |                     |
|-----------|---------------|----------------------|-----------------------------|-------------|---------------------|----------|-------|---------|---------------------|
|           | Initial Count | Trimmed <sup>b</sup> | Low Complexity <sup>c</sup> | Final Count | Length <sup>a</sup> | 16S rRNA | Human | Number  | Length <sup>a</sup> |
| Subject 1 |               |                      |                             |             |                     |          |       |         |                     |
| Saliva    | 1,829,696     | 587,398              | 918                         | 1,241,380   | 96                  | 0        | 0     | 181     | 616                 |
| Plaque    | 721,943       | 99,308               | 0                           | 622,635     | 73                  | 0        | 0     | 676     | 735                 |
| Subject 2 |               |                      |                             |             |                     |          |       |         |                     |
| Saliva    | 1,257,920     | 620,965              | 444                         | 636,511     | 85                  | 0        | 0     | 2,094   | 606                 |
| Plaque    | 2,660,190     | 801,870              | 893                         | 1,857,427   | 91                  | 0        | 2     | 970     | 912                 |
| Subject 3 |               |                      |                             |             |                     |          |       |         |                     |
| Saliva    | 941,661       | 389,494              | 1,502                       | 544,665     | 89                  | 0        | 0     | 735     | 646                 |
| Plaque    | 2,668,766     | 1,503,124            | 1,140                       | 1,164,502   | 93                  | 0        | 721   | 1,543   | 695                 |
| Subject 4 |               |                      |                             |             |                     |          |       |         |                     |
| Saliva    | 1,295,882     | 536,633              | 102                         | 759,147     | 96                  | 0        | 0     | 838     | 716                 |
| Plaque    | 995,619       | 53,635               | 0                           | 941,984     | 87                  | 0        | 0     | 673     | 716                 |

<sup>a</sup>Mean length

<sup>b</sup>Number of reads removed based on quality scores

<sup>c</sup>Reads removed based on multiple homopolymers

**Table S4**  
**16S rRNA reads from each subject**

|           | Initial Count | Removed <sup>a</sup> | Final Count | Mean Length |
|-----------|---------------|----------------------|-------------|-------------|
| Subject 1 |               |                      |             |             |
| Saliva    | 23,628        | 9,062                | 14,566      | 172         |
| Plaque    | 40,766        | 24,022               | 16,744      | 167         |
| Subject 2 |               |                      |             |             |
| Saliva    | 29,757        | 17,672               | 12,085      | 169         |
| Plaque    | 38,000        | 19,745               | 18,255      | 165         |
| Subject 3 |               |                      |             |             |
| Saliva    | 51,090        | 32,895               | 18,195      | 173         |
| Plaque    | 102,756       | 57,051               | 45,705      | 169         |
| Subject 4 |               |                      |             |             |
| Saliva    | 53,380        | 19,325               | 34,055      | 175         |
| Plaque    | 82,079        | 50,964               | 24,779      | 164         |

<sup>a</sup>Removed based on length, ambiguity, quality, and homopolymers

**Table S5.** CRISPR repeat motifs in different streptococci

---

| <b>SGII</b>            | <b>SGI</b>             |
|------------------------|------------------------|
| <i>S. gordonii</i>     | <i>S. mutans</i>       |
| <i>S. thermophilus</i> | <i>S. thermophilus</i> |
| <i>S. gallolyticus</i> | <i>S. gallolyticus</i> |
| <i>S. anginosus</i>    | <i>S. anginosus</i>    |
| <i>S. salivarius</i>   | <i>S. salivarius</i>   |
| <i>S. intermedius</i>  | <i>S. infantarius</i>  |
| <i>S. suis</i>         | <i>S. mitis</i>        |
| <i>S. pasteurianus</i> | <i>S. sanguinis</i>    |
| <i>S. macedonicus</i>  | <i>S. pyogenes</i>     |
|                        | <i>S. agalactiae</i>   |
|                        | <i>S. dysgalactiae</i> |
|                        | <i>S. equi</i>         |

---

**Table S6****Streptococcal Group I (SGI) CRISPRs from each subject**

|                           | Number of Reads | Number of Spacers | Spacer Groups | Mean Length | Median Length |
|---------------------------|-----------------|-------------------|---------------|-------------|---------------|
| Subject 1                 |                 |                   |               |             |               |
| Saliva                    | 43,466          | 25,465            | 207           | 30          | 30            |
| Plaque                    | 93,762          | 53,974            | 356           | 30          | 30            |
| All Combined <sup>a</sup> | 137,228         | 79,439            | 306           | 30          | 30            |
| Subject 2                 |                 |                   |               |             |               |
| Saliva                    | 48,646          | 25,535            | 256           | 30          | 30            |
| Plaque                    | 111,734         | 65,717            | 289           | 30          | 30            |
| All Combined <sup>a</sup> | 160,380         | 91,252            | 349           | 30          | 30            |
| Subject 3                 |                 |                   |               |             |               |
| Saliva                    | 31,479          | 16,844            | 388           | 30          | 30            |
| Plaque                    | 92,001          | 45,757            | 467           | 30          | 30            |
| All Combined <sup>a</sup> | 123,480         | 62,601            | 473           | 30          | 30            |
| Subject 4                 |                 |                   |               |             |               |
| Saliva                    | 143,840         | 25,492            | 193           | 30          | 30            |
| Plaque                    | 121,286         | 34,355            | 301           | 30          | 30            |
| All Combined <sup>a</sup> | 265,126         | 59,847            | 428           | 30          | 30            |
| All Subjects              |                 |                   |               |             |               |
| Saliva                    | 267,431         | 93,336            | 957           | 30          | 30            |
| Plaque                    | 418,783         | 199,803           | 1,251         | 30          | 30            |
| All Combined <sup>a</sup> | 686,214         | 293,139           | 1,912         | 30          | 30            |

<sup>a</sup>Determined by combining all spacers prior to binning based on trinucleotide content

**Table S7****Streptococcal Group II (SGII) CRISPRs from each subject**

|              |                           | Number of Reads | Number of Spacers | Spacer Groups | Mean Length | Median Length |
|--------------|---------------------------|-----------------|-------------------|---------------|-------------|---------------|
| Subject 1    | Saliva                    | 81,466          | 24,178            | 105           | 29          | 30            |
|              | Plaque                    | 121,592         | 36,065            | 378           | 29          | 30            |
|              | All Combined <sup>a</sup> | 203,058         | 60,243            | 284           | 29          | 29            |
| Subject 2    | Saliva                    | 25,672          | 16,804            | 316           | 30          | 30            |
|              | Plaque                    | 153,425         | 32,117            | 469           | 29          | 29            |
|              | All Combined <sup>a</sup> | 179,097         | 48,921            | 384           | 29          | 29            |
| Subject 3    | Saliva                    | 27,636          | 16,172            | 254           | 29          | 30            |
|              | Plaque                    | 128,471         | 53,427            | 509           | 30          | 30            |
|              | All Combined <sup>a</sup> | 156,107         | 69,599            | 439           | 30          | 30            |
| Subject 4    | Saliva                    | 40,068          | 15,694            | 199           | 29          | 30            |
|              | Plaque                    | 220,116         | 34,652            | 180           | 30          | 30            |
|              | All Combined <sup>a</sup> | 260,184         | 50,346            | 270           | 30          | 30            |
| All Subjects | Saliva                    | 174,842         | 72,842            | 750           | 29          | 30            |
|              | Plaque                    | 623,604         | 156,261           | 1,272         | 29          | 30            |
|              | All Combined <sup>a</sup> | 798,446         | 229,103           | 1,084         | 29          | 30            |

<sup>a</sup>Determined by combining all spacers prior to binning based on trinucleotide content

# Table S8 - CRISPR spacer homologues

| Sample Type<br>Subject Number | Streptococcal Group II |             |             |             |             |             |             |             | Streptococcal Group I |             |             |             |             |             |             |             |
|-------------------------------|------------------------|-------------|-------------|-------------|-------------|-------------|-------------|-------------|-----------------------|-------------|-------------|-------------|-------------|-------------|-------------|-------------|
|                               | Saliva<br>1            | Plaque<br>1 | Saliva<br>2 | Plaque<br>2 | Saliva<br>3 | Plaque<br>3 | Saliva<br>4 | Plaque<br>4 | Saliva<br>1           | Plaque<br>1 | Saliva<br>2 | Plaque<br>2 | Saliva<br>3 | Plaque<br>3 | Saliva<br>4 | Plaque<br>4 |
| <b>Streptococcal Phage</b>    |                        |             |             |             |             |             |             |             |                       |             |             |             |             |             |             |             |
| S. phage 040922               | 0                      | 43          | 12          | 2           | 1           | 24          | 26          | 17          | 0                     | 4           | 1           | 0           | 0           | 0           | 7           | 0           |
| S. phage 11865                | 0                      | 0           | 0           | 1           | 1           | 0           | 2           | 1           | 0                     | 1           | 0           | 0           | 2           | 1           | 0           | 0           |
| S. phage 2167                 | 0                      | 2           | 1           | 8           | 5           | 24          | 5           | 5           | 11                    | 6           | 3           | 1           | 3           | 10          | 0           | 0           |
| S. phage 34117                | 0                      | 0           | 0           | 5           | 2           | 3           | 2           | 0           | 4                     | 1           | 0           | 0           | 6           | 0           | 0           | 0           |
| S. phage 5093                 | 0                      | 0           | 0           | 0           | 0           | 0           | 0           | 0           | 0                     | 6           | 0           | 0           | 0           | 0           | 0           | 2           |
| S. phage 7201                 | 0                      | 0           | 0           | 0           | 0           | 0           | 0           | 0           | 0                     | 14          | 0           | 1           | 0           | 0           | 0           | 0           |
| S. phage 8140                 | 0                      | 0           | 0           | 30          | 9           | 6           | 4           | 2           | 0                     | 0           | 1           | 18          | 0           | 0           | 0           | 0           |
| S. phage 858                  | 0                      | 2           | 0           | 0           | 0           | 0           | 0           | 0           | 0                     | 0           | 0           | 1           | 0           | 0           | 0           | 0           |
| S. phage Abc2                 | 0                      | 0           | 0           | 0           | 4           | 0           | 0           | 1           | 1                     | 0           | 0           | 0           | 0           | 0           | 0           | 0           |
| S. phage ALQ13.2              | 0                      | 0           | 7           | 0           | 0           | 0           | 0           | 0           | 0                     | 2           | 0           | 2           | 0           | 0           | 0           | 3           |
| S. phage CP1                  | 19                     | 3           | 4           | 11          | 0           | 57          | 4           | 14          | 2                     | 31          | 5           | 6           | 10          | 41          | 38          | 29          |
| S. phage CP7                  | 0                      | 0           | 0           | 0           | 0           | 7           | 0           | 0           | 0                     | 0           | 0           | 0           | 0           | 0           | 0           | 0           |
| S. phage DP1                  | 6                      | 26          | 10          | 15          | 1           | 5           | 12          | 2           | 0                     | 22          | 12          | 9           | 7           | 4           | 0           | 0           |
| S. phage DT1                  | 0                      | 0           | 0           | 0           | 0           | 0           | 0           | 0           | 0                     | 1           | 0           | 0           | 0           | 0           | 0           | 0           |
| S. phage DT1.1                | 0                      | 0           | 0           | 0           | 0           | 0           | 0           | 0           | 0                     | 4           | 0           | 0           | 0           | 0           | 0           | 0           |
| S. phage EJ1                  | 0                      | 1           | 0           | 11          | 1           | 11          | 1           | 50          | 0                     | 3           | 0           | 2           | 0           | 4           | 11          | 11          |
| S. phage M102                 | 0                      | 1           | 0           | 0           | 0           | 0           | 0           | 0           | 0                     | 0           | 0           | 0           | 0           | 0           | 0           | 0           |
| S. phage MD2                  | 0                      | 1           | 0           | 0           | 0           | 0           | 0           | 0           | 0                     | 0           | 0           | 0           | 0           | 0           | 0           | 0           |
| S. phage MM1 1998             | 0                      | 0           | 0           | 0           | 0           | 1           | 0           | 1           | 0                     | 0           | 0           | 0           | 0           | 0           | 0           | 0           |
| S. phage PH10                 | 2                      | 42          | 15          | 56          | 67          | 38          | 24          | 26          | 0                     | 13          | 20          | 60          | 13          | 37          | 10          | 0           |
| S. phage PH15                 | 0                      | 40          | 9           | 1           | 0           | 8           | 14          | 16          | 0                     | 2           | 0           | 0           | 1           | 0           | 1           | 0           |
| S. phage Sfi11                | 0                      | 0           | 0           | 1           | 0           | 0           | 0           | 1           | 1                     | 0           | 0           | 2           | 0           | 0           | 0           | 0           |
| S. phage SM1                  | 4                      | 0           | 2           | 61          | 2           | 30          | 19          | 13          | 3                     | 21          | 45          | 40          | 4           | 51          | 8           | 26          |
| S. phage SMP                  | 0                      | 0           | 0           | 0           | 0           | 3           | 0           | 0           | 0                     | 0           | 0           | 0           | 15          | 4           | 0           | 0           |
| S. phage V22                  | 0                      | 0           | 0           | 2           | 2           | 20          | 3           | 0           | 0                     | 5           | 0           | 0           | 0           | 1           | 5           | 25          |
| S. phage YMC-2011             | 0                      | 4           | 1           | 9           | 0           | 0           | 0           | 0           | 0                     | 3           | 0           | 2           | 2           | 0           | 2           | 6           |

Streptococcal Plasmids and Transposons



|                       |    |   |   |   |   |   |   |    |   |    |   |   |   |    |   |    |
|-----------------------|----|---|---|---|---|---|---|----|---|----|---|---|---|----|---|----|
| S. plasmid 1          | 0  | 0 | 0 | 0 | 1 | 4 | 4 | 6  | 0 | 0  | 0 | 1 | 0 | 0  | 0 | 0  |
| S. plasmid pDRPIS7493 | 0  | 0 | 0 | 0 | 0 | 0 | 0 | 0  | 0 | 0  | 0 | 0 | 0 | 2  | 7 | 22 |
| S. plasmid pFW213     | 2  | 0 | 0 | 0 | 0 | 0 | 0 | 0  | 0 | 2  | 1 | 0 | 0 | 0  | 0 | 0  |
| S. plasmid pND103     | 0  | 0 | 0 | 1 | 0 | 0 | 0 | 0  | 0 | 0  | 0 | 0 | 0 | 0  | 0 | 0  |
| S. plasmid pSMQ173b   | 0  | 0 | 0 | 0 | 0 | 1 | 1 | 4  | 0 | 0  | 0 | 0 | 0 | 0  | 0 | 0  |
| S. plasmid pSMQ-316   | 0  | 0 | 0 | 0 | 0 | 0 | 0 | 0  | 0 | 0  | 0 | 0 | 0 | 0  | 0 | 1  |
| S. plasmid pSpnP1     | 74 | 3 | 1 | 1 | 0 | 0 | 0 | 42 | 0 | 21 | 0 | 0 | 0 | 43 | 6 | 24 |
| S. transposon Tn1311  | 0  | 0 | 0 | 0 | 0 | 0 | 0 | 0  | 0 | 0  | 0 | 0 | 0 | 0  | 2 | 0  |

## Streptococcal Genomes

|                               |   |    |   |    |   |    |    |    |    |    |   |    |    |   |    |    |
|-------------------------------|---|----|---|----|---|----|----|----|----|----|---|----|----|---|----|----|
| S. gallolyticus ATCC BAA-2069 | 0 | 0  | 2 | 0  | 0 | 0  | 0  | 0  | 0  | 0  | 0 | 0  | 0  | 0 | 0  | 0  |
| S. gallolyticus UCN34         | 0 | 0  | 0 | 4  | 0 | 0  | 0  | 0  | 0  | 0  | 0 | 5  | 0  | 0 | 0  | 0  |
| S. gordonii CH1               | 0 | 0  | 0 | 0  | 0 | 5  | 8  | 15 | 0  | 0  | 0 | 0  | 0  | 0 | 0  | 0  |
| S. mitis B6 complete genome   | 0 | 0  | 0 | 55 | 4 | 17 | 2  | 81 | 0  | 0  | 4 | 6  | 3  | 1 | 1  | 1  |
| S. mutans UA159               | 0 | 0  | 1 | 0  | 0 | 0  | 0  | 0  | 0  | 0  | 0 | 0  | 0  | 0 | 0  | 0  |
| S. oralis Uo5                 | 0 | 0  | 0 | 0  | 0 | 2  | 0  | 3  | 0  | 0  | 0 | 0  | 0  | 0 | 0  | 0  |
| S. parasanguinis ATCC 15912   | 0 | 0  | 0 | 0  | 0 | 0  | 0  | 2  | 0  | 0  | 0 | 0  | 0  | 0 | 0  | 13 |
| S. pneumoniae 19A-6           | 0 | 1  | 0 | 1  | 1 | 0  | 1  | 1  | 0  | 0  | 0 | 1  | 0  | 0 | 0  | 0  |
| S. pneumoniae 670-6B          | 0 | 1  | 0 | 1  | 0 | 12 | 8  | 16 | 0  | 0  | 0 | 0  | 1  | 0 | 0  | 0  |
| S. pneumoniae 70585           | 0 | 0  | 0 | 0  | 0 | 1  | 0  | 0  | 0  | 0  | 0 | 0  | 2  | 1 | 1  | 0  |
| S. pneumoniae AP200           | 0 | 0  | 0 | 1  | 0 | 16 | 14 | 8  | 0  | 5  | 1 | 1  | 1  | 3 | 6  | 8  |
| S. pneumoniae ATCC 700669     | 7 | 0  | 0 | 5  | 0 | 3  | 0  | 0  | 0  | 4  | 3 | 3  | 1  | 2 | 1  | 0  |
| S. pneumoniae G54             | 0 | 0  | 0 | 6  | 0 | 0  | 1  | 1  | 0  | 0  | 0 | 2  | 0  | 0 | 0  | 0  |
| S. pneumoniae JJA             | 0 | 0  | 0 | 4  | 1 | 0  | 0  | 0  | 0  | 0  | 1 | 2  | 0  | 0 | 1  | 0  |
| S. pneumoniae OXC141          | 0 | 0  | 0 | 1  | 0 | 17 | 3  | 3  | 12 | 3  | 2 | 0  | 10 | 2 | 0  | 0  |
| S. pneumoniae P1031           | 0 | 0  | 0 | 2  | 0 | 0  | 1  | 1  | 0  | 0  | 1 | 0  | 0  | 0 | 0  | 0  |
| S. pseudopneumoniae IS7493    | 0 | 12 | 1 | 84 | 4 | 25 | 4  | 18 | 20 | 21 | 4 | 5  | 11 | 7 | 11 | 13 |
| S. salivarius JIM8777         | 0 | 14 | 1 | 24 | 1 | 0  | 0  | 5  | 0  | 0  | 0 | 16 | 2  | 0 | 30 | 0  |
| S. thermophilus DGCC1443      | 0 | 0  | 0 | 2  | 0 | 0  | 0  | 0  | 0  | 3  | 0 | 1  | 0  | 0 | 1  | 0  |
| S. thermophilus JIM 8229      | 0 | 0  | 0 | 0  | 0 | 0  | 0  | 0  | 0  | 10 | 0 | 0  | 0  | 0 | 0  | 0  |
| S. thermophilus DGCC 7710     | 0 | 0  | 0 | 0  | 0 | 1  | 0  | 1  | 0  | 0  | 0 | 0  | 0  | 0 | 0  | 0  |
| S. thermophilus DGCC292       | 0 | 0  | 0 | 0  | 0 | 0  | 0  | 0  | 0  | 0  | 0 | 0  | 0  | 0 | 0  | 1  |
| S. thermophilus DGCC66        | 0 | 0  | 0 | 0  | 0 | 0  | 0  | 0  | 0  | 0  | 1 | 0  | 0  | 0 | 0  | 0  |

|                                |   |   |   |   |   |   |   |   |   |    |   |   |   |   |   |     |
|--------------------------------|---|---|---|---|---|---|---|---|---|----|---|---|---|---|---|-----|
| S. thermophilus DGCC766        | 0 | 0 | 0 | 5 | 0 | 1 | 0 | 0 | 0 | 5  | 0 | 3 | 0 | 0 | 0 | 10  |
| S. thermophilus DGCC7796       | 0 | 0 | 0 | 0 | 0 | 0 | 0 | 0 | 0 | 0  | 0 | 0 | 2 | 1 | 0 | 145 |
| S. thermophilus DGCC7809       | 0 | 0 | 0 | 0 | 0 | 0 | 0 | 0 | 0 | 0  | 0 | 1 | 0 | 0 | 0 | 11  |
| S. thermophilus DGCC7984       | 0 | 0 | 0 | 1 | 0 | 0 | 0 | 0 | 0 | 0  | 0 | 0 | 0 | 0 | 0 | 0   |
| S. thermophilus JIM 8230       | 0 | 0 | 0 | 0 | 0 | 0 | 0 | 0 | 0 | 0  | 0 | 0 | 1 | 0 | 0 | 0   |
| S. thermophilus LMG 18311      | 0 | 0 | 0 | 0 | 0 | 2 | 2 | 1 | 0 | 0  | 0 | 0 | 0 | 0 | 0 | 0   |
| S. thermophilus ND03           | 0 | 0 | 0 | 0 | 0 | 0 | 0 | 0 | 1 | 4  | 0 | 0 | 0 | 0 | 0 | 0   |
| S. thermophilus WTphi858phi297 | 0 | 0 | 0 | 0 | 0 | 2 | 0 | 0 | 0 | 13 | 0 | 1 | 0 | 2 | 0 | 8   |

### Non Streptococci

|                                    |   |   |   |   |   |   |   |   |   |   |   |   |   |   |   |   |
|------------------------------------|---|---|---|---|---|---|---|---|---|---|---|---|---|---|---|---|
| Bacillus cereus 03BB102            | 0 | 0 | 0 | 0 | 0 | 0 | 0 | 1 | 0 | 0 | 0 | 0 | 0 | 0 | 0 | 0 |
| Bacillus cereus AH820              | 0 | 0 | 0 | 0 | 0 | 1 | 0 | 0 | 0 | 0 | 0 | 0 | 0 | 0 | 0 | 0 |
| Bacillus plasmid WSH-002           | 0 | 2 | 0 | 0 | 0 | 0 | 0 | 0 | 0 | 0 | 0 | 0 | 0 | 0 | 0 | 0 |
| Cellulophaga algicola DSM 14237    | 0 | 1 | 0 | 0 | 0 | 0 | 0 | 0 | 0 | 0 | 0 | 0 | 0 | 0 | 0 | 0 |
| Clostridium botulinum E3           | 0 | 0 | 0 | 3 | 0 | 0 | 0 | 0 | 0 | 4 | 3 | 6 | 0 | 4 | 1 | 0 |
| Clostridium difficile BI1          | 0 | 0 | 0 | 0 | 0 | 0 | 0 | 1 | 0 | 0 | 0 | 0 | 0 | 0 | 0 | 0 |
| Clostridium difficile M120         | 0 | 1 | 1 | 0 | 0 | 0 | 0 | 0 | 0 | 0 | 0 | 0 | 0 | 0 | 0 | 0 |
| Clostridium tetani E88             | 0 | 0 | 0 | 0 | 0 | 0 | 0 | 0 | 0 | 1 | 1 | 0 | 0 | 0 | 0 | 0 |
| Cyanothece sp. PCC 7822            | 0 | 0 | 0 | 0 | 0 | 3 | 0 | 0 | 0 | 0 | 0 | 0 | 0 | 1 | 0 | 0 |
| Desulfobacterium sp.               | 0 | 0 | 0 | 0 | 0 | 0 | 1 | 0 | 0 | 0 | 0 | 0 | 0 | 0 | 0 | 0 |
| Eubacterium limosum KIST612        | 0 | 0 | 0 | 0 | 0 | 0 | 0 | 0 | 0 | 0 | 1 | 1 | 0 | 0 | 0 | 0 |
| Fusobacterium nucleatum ATCC 255   | 0 | 0 | 0 | 1 | 0 | 0 | 0 | 0 | 0 | 0 | 0 | 0 | 0 | 0 | 0 | 0 |
| Geobacillus sp. WCH70              | 0 | 0 | 0 | 0 | 0 | 0 | 0 | 0 | 0 | 1 | 0 | 0 | 0 | 0 | 0 | 0 |
| Lactobacillus delbrueckii ND02     | 0 | 0 | 0 | 0 | 0 | 0 | 0 | 0 | 0 | 0 | 0 | 1 | 0 | 0 | 0 | 0 |
| Lactobacillus salivarius CECT 5713 | 0 | 0 | 0 | 0 | 0 | 0 | 0 | 1 | 0 | 0 | 0 | 0 | 0 | 0 | 0 | 0 |
| Listeria monocytogenes Clip80459   | 0 | 0 | 0 | 0 | 0 | 0 | 0 | 0 | 1 | 0 | 0 | 0 | 0 | 0 | 0 | 0 |
| Listeria monocytogenes FSL R2-561  | 0 | 0 | 0 | 0 | 0 | 0 | 1 | 0 | 0 | 0 | 0 | 0 | 0 | 0 | 0 | 0 |
| Little cherry virus 2 USA6b        | 0 | 0 | 0 | 0 | 0 | 0 | 0 | 0 | 0 | 0 | 1 | 0 | 0 | 0 | 0 | 0 |
| Lysinibacillus sphaericus C3-41    | 0 | 0 | 0 | 0 | 0 | 0 | 0 | 0 | 0 | 0 | 0 | 1 | 0 | 0 | 0 | 0 |
| Marinobacter adhaerens HP15        | 0 | 0 | 0 | 0 | 0 | 0 | 0 | 0 | 0 | 0 | 1 | 0 | 0 | 0 | 0 | 0 |
| Neisseria gonorrhoeae MS11         | 0 | 2 | 1 | 0 | 0 | 6 | 0 | 0 | 0 | 0 | 0 | 0 | 2 | 6 | 0 | 0 |
| Pediococcus pentosaceus ATCC 25745 | 0 | 0 | 0 | 0 | 0 | 2 | 1 | 2 | 0 | 0 | 0 | 0 | 0 | 0 | 0 | 0 |



**Table S9. CRISPR Repeat Motifs and Primers**

| Name                                    |           |                                                               |
|-----------------------------------------|-----------|---------------------------------------------------------------|
| <b>Streptococcus (SGII)<sup>a</sup></b> | Consensus | GTTGTACAGTTACTTAAATCTTGAGAGTACAAAAAC                          |
|                                         | Forward   | CCATCTCATCCCTGCGTGTCTCCGACTCAGXXXXXXXXXXCAGTTACTTAAATCTTGAGAG |
|                                         | Reverse   | CCTCTCTATGGGCAGTCGGTGATAGATTTAAGTAAGTACTGTACAAC               |
| <b>Streptococcus (SGI)<sup>b</sup></b>  | Consensus | GTTTTGGAACCATTTCGAAACAACACAGCTCTAAAAC                         |
|                                         | Forward   | CCATCTCATCCCTGCGTGTCTCCGACTCAGXXXXXXXXXXCGTTTACGGTATTGAAAC    |
|                                         | Reverse   | CCTCTCTATGGGCAGTCGGTGATGGTAAGCACTGTTGCAAC                     |

<sup>a</sup>Identified from *Streptococcus gordonii*

<sup>b</sup>Identified from *Streptococcus mutans*

<sup>c</sup>X's represent the location of the barcode sequence

**Table S10****Barcode adaptors for primers**

| Barcode Number             | Barcode Sequence |
|----------------------------|------------------|
| <b>Viromes</b>             |                  |
| 1                          | ACGAGTGCGT       |
| 2                          | ACGCTCGACA       |
| 3                          | AGACGCACTC       |
| 4                          | AGCACTGTAG       |
| 5                          | ATCAGACACG       |
| 6                          | ATATCGCGAG       |
| 7                          | CGTGTCTCTA       |
| 8                          | CTCGCGTGTC       |
| 9                          | TAGTATCAGC       |
| 10                         | TCTCTATGCG       |
| 11                         | TGATACGTCT       |
| <b>16S rRNA or CRISPRs</b> |                  |
| 1                          | ACGAGTGCGT       |
| 2                          | ACGCTCGACA       |
| 3                          | AGACGCACTC       |
| 4                          | AGCACTGTAG       |
| 5                          | ATCAGACACG       |
| 6                          | ATATCGCGAG       |
| 7                          | CGTGTCTCTA       |
| 8                          | CTCGCGTGTC       |
| 9                          | TAGTATCAGC       |
| 10                         | TCTCTATGCG       |
| 11                         | TGATACGTCT       |
| 12                         | TACTGAGCTA       |
| 13                         | CATAGTAGTG       |
| 14                         | CGAGAGATAC       |
| 15                         | ATACGACGTA       |
| 16                         | TCACGTACTA       |
| 17                         | CGTCTAGTAC       |
| 18                         | TCTACGTAGC       |
| 19                         | TGTACTACTC       |
| 20                         | ACGACTACAG       |
| 21                         | CGTAGACTAG       |
| 22                         | TACGAGTATG       |
| 23                         | TACTCTCGTG       |
